## Transformations, Comparisons, and Analysis of Down to Up Protomer States of Variants of the SARS-CoV-2 Prefusion Spike Protein Including the UK Variant B.1.1.7

Michael H. Peters<sup>1\*</sup>, Oscar Bastidas<sup>2</sup>, Daniel S. Kokron<sup>3</sup>, Christopher E. Henze<sup>3</sup>

**1** Department of Chemical and Life Science Engineering, Virginia Commonwealth University, Richmond, Virginia, United States of America

**2** College of Biological Sciences, University of Minnesota, Minneapolis, Minnesota, United States of America

**3** NASA Ames Research Center, Moffett Field, California, United States of America.

\*email: mpeters@vcu.edu

### Abstract

Monitoring and strategic response to variants in SARS-CoV-2 represents a considerable challenge in the current pandemic, as well as potentially future viral outbreaks of similar magnitude. In particular mutations and deletions involving the virion's prefusion Spike protein has significant potential impact on vaccines and therapeutics that utilize this key structural viral protein in their mitigation strategies. In this study, we have demonstrated how dominant energetic landscape mappings ("glue points") coupled with sequence alignment information can potentially identify or flag key residue mutations and deletions associated with variants. Surprisingly, we also found excellent homology of stabilizing residue glue points across the lineage of  $\beta$  coronavirus Spike proteins, and we have termed this as "sequence homologous glue points". In general, these flagged residue mutations and/or deletions are then computationally studied in detail using all-atom biocomputational molecular dynamics over approximately one microsecond in order to ascertain structural and energetic changes in the Spike protein associated variants. Specifically, we examined both a theoretically-based triple mutant and the so-called UK or B.1.1.7 variant. For the theoretical triple mutant, we demonstrated through Alanine mutations, which help "unglue" key residue-residue interactions, that these three key stabilizing residues could cause the transition of Down to Up protomer states, where the Up protomer state allows binding of the prefusion Spike protein to hACE2 host cell receptors, whereas the Down state is believed inaccessible. For the B.1.1.7 variant, we demonstrated the critical importance of D614G and N501Y on the structure and binding of the Spike protein associated variant. In particular, we had previously identified D614 as a key glue point in the inter-protomer stabilization of the Spike protein. Other mutations and deletions associated with this variant did not appear to play a pivotal role in structure or binding changes. The mutant D614G is a structure breaking Glycine mutation demonstrating a relatively large hinge angle and highly stable Up conformation in agreement with previous studies. In addition, we demonstrate that the mutation N501Y may significantly increase the Spike protein binding to hACE2 cell receptors through its interaction with Y41 of hACE2 forming a potentially strong hydrophobic residue binding pair. We note that these two key mutations, D614G and N501Y, are also found in the so-called South African (SA; B.1.351) variant of SARS-CoV-2. Future studies along these lines are therefore aimed at mapping glue points to residue mutations and deletions of associated prefusion Spike protein variants in order to help direct and optimize efforts aimed at the mitigation of this deadly virion.

## I. Introduction

$\beta$  coronaviruses represent one (B) of four genera (A,B,C,and D) of RNA positive sense viruses in the Nidovirales order [1, 2]. The current pandemic COVID-19 caused by SARS-CoV-2 is the latest in human viral outbreaks of this genera being preceded by the Middle Eastern Respiratory Coronavirus (MERS-CoV) and the SARS-CoV outbreak of 2002. SARS-CoV-2 continues to exhibit high rates of transmission and infection across the globe in the current pandemic. Of great present concern are variants that may show relative increased transmission and infection rates and, in addition, may present challenges to current and developing vaccines as well as therapeutics aimed at mitigation of this deadly virion. Of note is that this virus has a genome size of  $\sim 30$  kilobases and an intrinsic proofreading mechanism to reduce mutation rates [3]. The mutation rate of SARS-CoV-2 has been estimated to be  $\sim 10^{-3}$  substitutions per site per year [3]. Genomic sequences of SARS-CoV-2 continue to be deposited in the GSAID (Global Initiative on Sharing all Influenza Data), which has allowed for the study of structural implications of mutations [4]. For example, the Spike protein mutation D614G has been associated with higher upper respiratory tract viral loads and appears to be omnipresent in recent genomic sequences across the globe [4, 5, 6]. In addition, another variant called the UK Variant or VOC 202012/01 or B.1.1.7 (classification system [7]) has been identified as a highly transmittable variant and involves both deletions and mutations in the Spike protein of this virion, including D614G. So, it is of great importance to determine how current and future variants may translate into altered transmission rates, viral loading differences, antibody and vaccine escape, and resistance to currently developing therapeutics. Here we focus on the analysis of mutations of the prefusion Spike protein, due to its omnipresent importance, as a partial guide to the potential effects of its mutations on structure, function, and possible behavioral changes of this virion.

A distinct characteristic of the coronaviruses are their large, trimeric Spike proteins that densely decorate the virion surface [8, 9, 10]. The Spike protein consists of three homologous protomers or chains where each one is  $\sim 1200$  amino acid residues in length (Fig. 1). In its prefusion state, each protomer consists of two large domains called S1 (most distal from the virion membrane) and S2 (most proximal to its membrane). In general, the S1 domain represents a prefusion domain ( $\sim 600$  residues) and the S2 domain ( $\sim 600$  residues) is the fusion domain. In general, the S2 or fusion machinery domain is relatively rigid with strong noncovalent intra and interchain interactions facilitated by helical secondary structures, whereas the S1 domain, which contains the host cell receptor binding domain (RBD) and N-terminal domain (NTD) in a V-shaped configuration (Fig. 1), is weaker, flexible, and characterized by beta-strand secondary structural motifs [11]. We note that the S1 domain of the Spike protein is shed in the transition from the prefusion state to the fusion state. The configuration of the RBD in the prefusion state is further characterized as being in the so-called "Up-state" or "Down-state" depending on the position of the RBD relative to the center of mass of the prefusion Spike protein. For example, in the Up-state, the RBD of both SARS-CoV and SARS-CoV-2 is more exposed and able to bind to its ACE2 (Angiotensin Converting Enzyme 2) receptor on the surface of human epithelial cells (Type I and II pneumocytes; also, alveolar macrophage and nasal mucosal cells), but in the "Down-state" the RBD is believed to be more hidden and significantly reduced to ACE2 binding and to cellular infection [12, 13, 14]. Quantified structural comparisons of the RBD configuration in the Up versus Down protomer states of SARS-CoV-2 have recently been done that include

angular positions of the RBD relative to the NTD of a given protomer [8]. Henderson et al [13] also quantified angular differences in the S1 subdomains of the Spike protein across the  $\beta$  coronaviruses SARS-CoV-2, SARS-CoV, MERS and HKU1 and developed mutational forms that can alter the equilibrium of Up versus Down states.

Given the critical importance of emerging variants of SARS-CoV-2 to vaccines and therapeutics, it is important to analyze the effects of mutations on the stability and dynamics of the Spike protein. Previously, we studied the stability and dynamics of the entire Spike protein of SARS-CoV-2 using a combination of all-atom dominant energetic analyses and biophysical computational molecular dynamics using published structures of the trimeric Spike protein [11]. We determined energetically dominant, non-covalent intra-protomer and inter-protomer interactions, called "glue" points or "hot" spots that help stabilize the entire trimeric protein structure. For example, we previously identified D614 as a key glue point with neighboring protomer residues ([11, 15], Table S1) prior to its emergence in current variants. We also mutated a key hot spot ('latch' residues) associated with intra-protomer interactions in order to demonstrate the ability for single protomers to change from Down to Up states. However, it was further demonstrated that in complete trimeric structures such transitions are held in check by inter-protomer interactions, specifically, the RBD of any protomer with the NTD of its neighbor.

In the current study, we computationally analyze structure and dynamic driven key mutations associated with Down versus Up protomer states of SARS-CoV-2; in particular, a theoretically-based triple mutant that is shown to destabilize neighboring RBD-NTD interactions. In addition, using these tools, we critically examine the UK variant B.1.1.7, including D614G mutation, in order to discern key differences in protomer configurations that could potentially impact vaccine and therapeutic efforts aimed at the debilitation of the current pandemic. We energetically map deletions and mutations associated with the B.1.1.7 variant against known glue points of SARS-CoV-2 Spike protein in order to determine potential structure/function changes associated with variants. We then dynamically analyze any associated conformational changes using all-atom molecular dynamics of the trimeric spike protein, including the B.1.1.7 and triple mutant variants over a 0.5 microsecond time period in order to ascertain differences in structural behavior. We also include sequence alignment analysis of deletions and mutations of B.1.1.7 across the lineages of  $\beta$ -coronaviruses SARS-CoV, MERS-CoV and HCoV looking for changes in conserved areas; such comparisons may also help in identifying critical deletions/mutations across current and future variants of SARS-CoV-2 and other  $\beta$ -coronaviruses. We determined through sequence alignment and energetic mappings highly conserved glue point residues across the lineages of  $\beta$ -coronaviruses despite clade differences. In addition, we are able to demonstrate dynamic changes in the UK Variant B.1.1.7 that can be traced to two key mutations resulting in a significantly more accessible RBD and simultaneously stronger binding to ACE2. These key mutations are also present in the rapidly emerging South African variant B.1.351. Our findings and analysis may have general applicability and may be important at ascertaining the potential effects of future variations of this virion on transmission, as well as vaccine and therapeutic effectiveness, in an attempt to stay ahead via sequence→function analysis of emerging variants.

## Materials and Methods

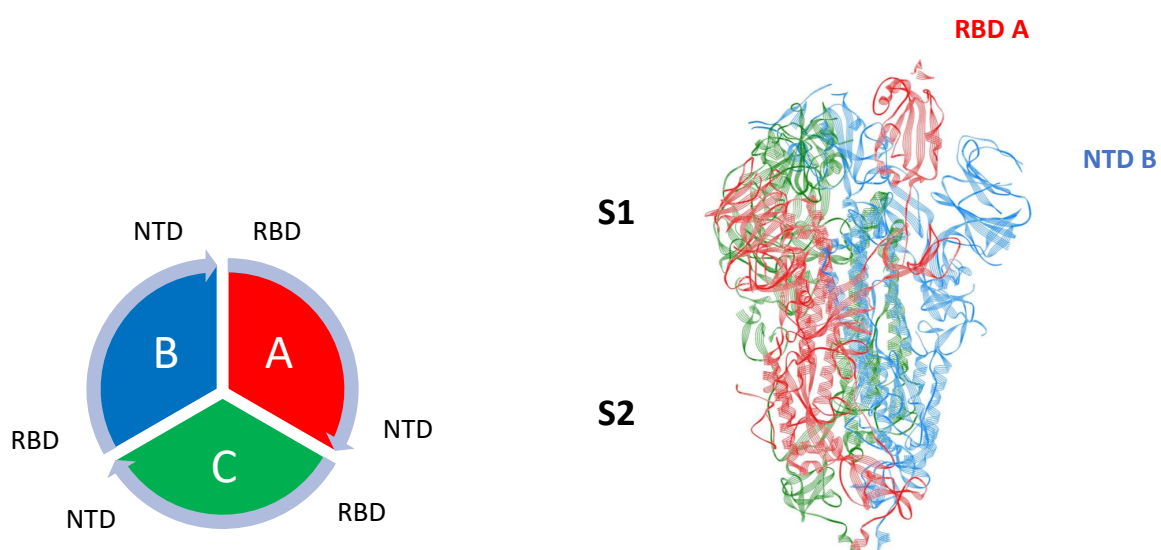

Figure 1: SARS-Cov-2  $\beta$  coronavirus (PDB ID: 6VSB) with one Up (A) and two Down (B,C) showing the S1 (binding ectodomain) and S2 (fusion) domains. Also shown is the overall chain interaction configuration looking at the trimer from the top view.

## Molecular Dynamics

Explicit solvent molecular dynamics (MD) simulations of the novel coronavirus Spike protein were performed using the NAMD2 program [16]. We used the CHARMM-Gui [17] with the CHARMM36m force field along with TIP3P water molecules to explicitly solvate proteins and add any missing residues from the experimental structure files. Disulfide bonds and glycosylated sites were all included. Simulations were carried out maintaining the number of simulated particles, pressure and temperature (the NPT ensemble) constant with the Langevin piston method specifically used to maintain a constant pressure of 1 atm. We employed periodic boundary conditions and initial equilibration for a water box simulation volume as well as the particle mesh Ewald (PME) method with a 20 Å cutoff distance between the simulated protein and water box edge. The integration time step was 2 femtoseconds with our protein simulations conducted under physiological conditions (37 C, pH of 7.4, physiological ionic strength with NaCl ions, LYS and ARG were protonated and HIS was not). All mutations were added via the CHARMM-Gui [17] and for deletions we chose to use Glycine as a structure breaking mutation in lieu of deleting residues, since exact structural information on deletions is currently lacking. Any other methods to revise structure, such as the SWISS model [18], would still be approximate and not based on the actual protein folding dynamics, whereas the more straight-forward, structure breaking Glycine represents a good test of the potential role of *deletions* on structure, as will be demonstrated here.

## Sequence Alignment

Multiple sequence alignment was performed using Clustal Omega [19]. Clustal Omega uses a structure guided hidden Markov model (HMM) for multiple sequence alignment. Sequences were obtained directly from the PDB files across four different  $\beta$  corona viruses: SARS-CoV (6ACD) [14], SARS-CoV-2 (6VSB) [10], MERS-CoV (6Q04) [20], and HCoV (6OHW) [21]. Output format was selected as ClustaW with character counts.

## All-Atom Energetic Mappings

Previously [11, 15], we analyzed the complete inter-protomer and intra-protomer interactions across two independently published structure files (6VSB and 6VYB) for SARS-CoV-2 trimeric Spike protein using the open source energy mapping algorithm developed by Krall et al [22]. This spatial and energetic mapping algorithm efficiently parses the strongest or most dominant non-covalent atom-atom interactions (charge and partial atomic charge, Born, and van der Waals forces), according to empirically established parsing criteria, based on the *ab initio* AMBER03 force field model. Following our previous studies, the parsing criteria were taken as the upper limit of  $-0.1kT$  units for Lennard-Jones (van der Waals) criteria and  $-0.3kT$  units for Coulombic interactions, although lower values can also be specified in the analysis part of the mappings in order to further refine the results [22]. Note that in the all-atom analysis dominant van der Waals interaction forces are commonly associated with nonpolar atom-atom interactions and hydrophobic protein interaction regions, whereas the Coulombic partial charge and charge interactions are commonly associated with hydrophilic protein interaction regions and can include hydrogen bonding and backbone atom partial charge interactions.

## RMSF and Hinge Angle Determinations

Here we follow the recent hinge angle designation of Peng et al [23] in order to help quantify and compare Up versus Down protomer states, namely  $\angle$ ASP406-VAL991-ALA622. Note that the vertex selected (VAL991) is in the rigid S2 domain and therefore is approximately fixed in the body frame of the protein. This designation helps to correct for any so-called "tumbling" effects associated with translation and rotations of the center of mass of the protein over large time scales necessary for these types of simulations. Those authors further designated hinge angles in the range 52.2 deg to 84.8 deg as ACE2 accessible domains (Up states) and angles in the range 31.6 deg to 52.2 deg as ACE2 inaccessible (Down states).

Root Mean Square Fluctuations (RMSF) C- $\alpha$  values across the 1124 residues for any protomer were determined according to

$$RMSF = \frac{1}{N} \sum_i^N [(x_i - x_{991})^2 + (y_i - y_{991}^2) + (z_i - z_{991})^2]$$

where (x,y,z) are the cartesian coordinates of any C- $\alpha$  residue, N is the number of snapshots considered, and deviations are measured relative to the body frame or VAL991 for consistency with hinge angle calculations and to correct for tumbling effects. Here we take snapshots of structures after every 1.0 nsec.

## Results

### Sequence Alignment and Glue Point Residues Across Lineages of $\beta$ coronaviruses

The color map sequence alignment across the entire Spike protein for the four  $\beta$  coronaviruses as obtained from Clustal Omega is shown in Fig. 2. As can be seen the greatest overall alignment homology is with the S2 or fusion domain and S1-NTD of this protein, and the greatest variation is in the RBD of S1. We also mapped from the original structure files the dominant energetic contacts or glue points of the stabilizing RBD-NTD neighboring chain interactions across these lineages as shown in Fig. 4, where we have superimposed predicted glue points over the sequence alignment. Somewhat surprisingly we found excellent sequence homology across almost all glue points despite clade differences among these lineages; below we refer to these as "sequence homologous glue points". Additionally, within the SARS-CoV and SARS-CoV-2 clade we found larger numbers of atom-atom interactions for the same glue point residues associated with SARS-CoV, indicative of a much stronger and more stable Down state configuration (Fig. 5). Note that these results were consistent across independently obtained experimental PDB deposited structure files: SARS-CoV-2 : 6VSB [9], 6VYB [10]; SARS-CoV: 6ACD [14], 6CRZ [24], as shown in Fig. 5.

### Triple Mutant versus Wild Type



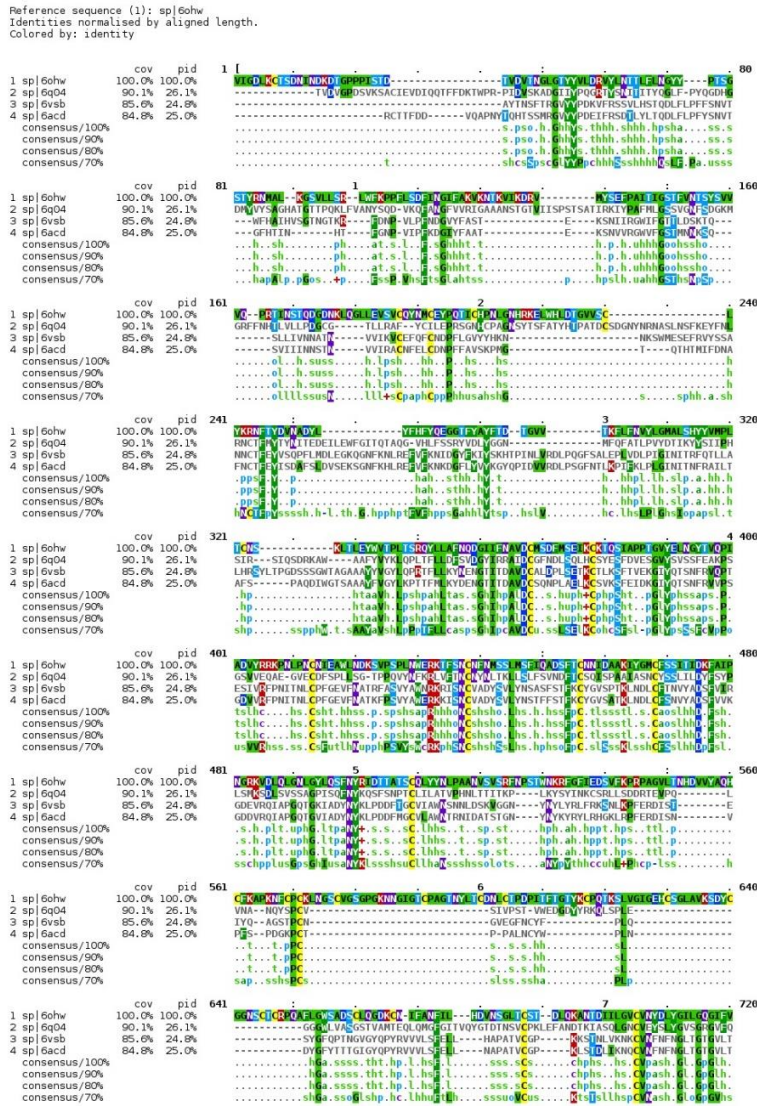

Figure 2: Sequence alignment for SARS-Cov, SARS-CoV-2, MERS, and HCoV. Original .ppt file is included in the Supplementary material for ease of viewing.

Previously, and as partially shown in Fig. 5 for Down-Down state interactions, we identified three critical glue point residues that help stabilize RBD-NTD inter-protomer interactions across both Down-Down and Up-Down states of SARS-CoV-2: viz., ARG357, ASN394, and HIS519 ([11], Figs. 3 and 4). These interactions helped prevent "latch" release from Down to Up states associated with Down state intra-protomer latch residues: GLN564 to ALA520-PRO521-ALA522. Note from Fig. 4 that these three stabilizing residues are also part of the sequence homologous glue points across the lineages of  $\beta$ -coronaviruses. Here we examine the triple Alanine mutant ARG357ALA, ASN394ALA, and HIS519ALA in order to determine if these key glue points alone could cause a conformational change in the absence of any latch mutations. Note that this so-called "Alanine screening" should diminish side chain interactions of those residues ("unglue")

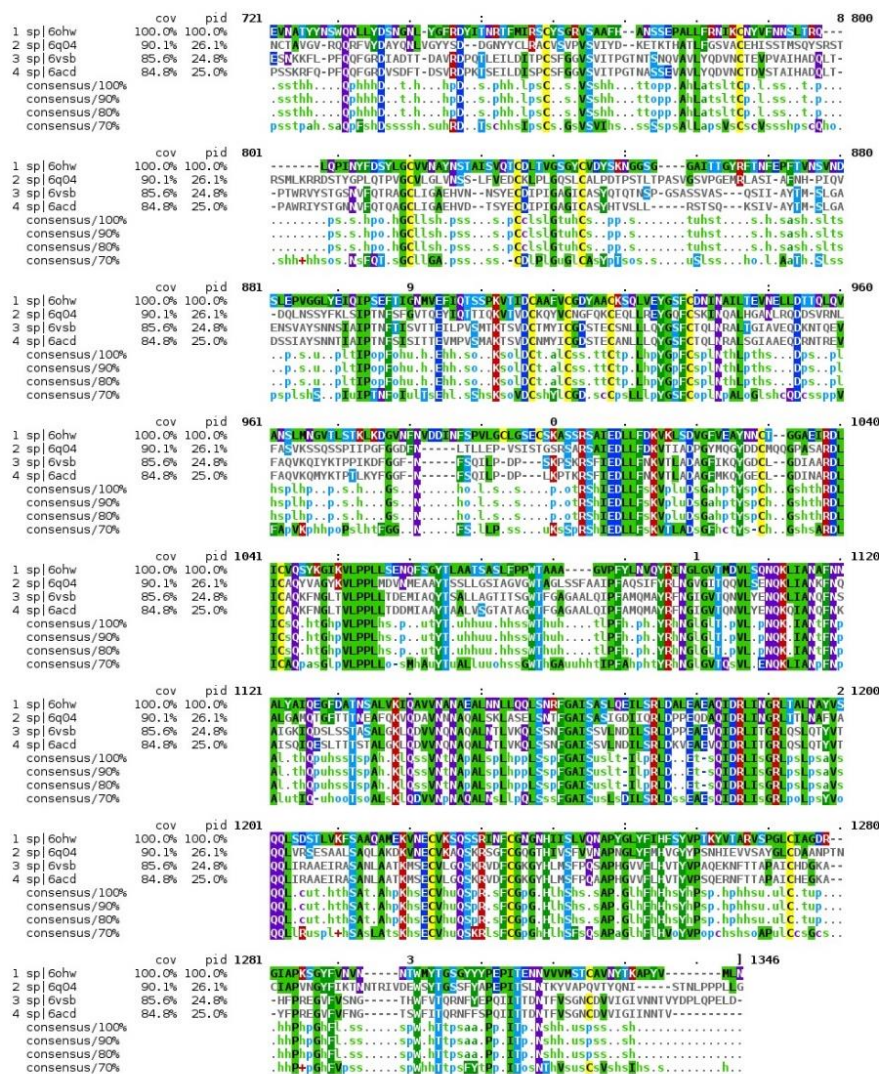

Figure 3: Sequence alignment for SARS-Cov, SARS-CoV-2, MERS, and HCoV. Original .ppt file is included in the Supplementary material for ease of viewing.

without significant initial structure changes. Figure 6 A-D shows MD calculated values of the hinge angle and RMSF values for what we have called wild type (WT) SARS-CoV-2 and the theoretical triple mutant. It is clear that a longer time period of over 200 nsec is required to reach a dynamic equilibrium state of either of these proteins from the starting configurations that include an initial NVT equilibrium period. In particular the WT hinge angle decreases by 0.2 radians or 12 deg from its starting state of 1 radian or approximately 60 deg putting it on the upper end of the ACE2-inaccessible region according to the criteria of Peng et al. [23] On the other hand, the theoretical triple mutant achieves the ACE2 accessible region after approximately 220 nsec and is maintained there throughout the remainder of the simulation. The triple mutant also shows more flexibility in its S1 domain, according to the calculated RMSF values, as compared



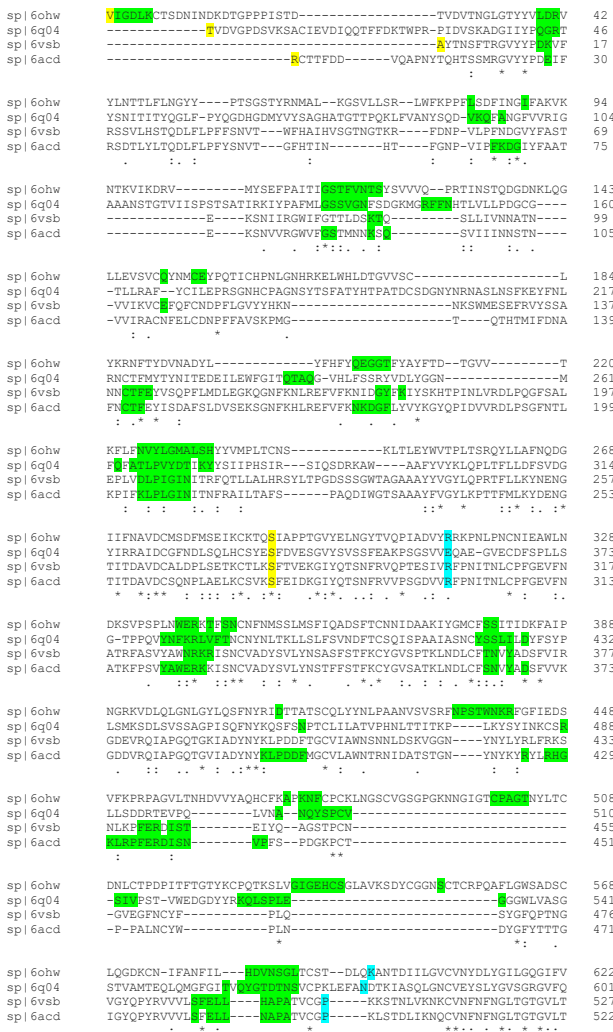

Figure 4: Combination of the Sequence Alignment Map with the Glue Point Map for the S1 Domain Across the  $\beta$  coronaviruses. Green shaded letters are the residues associated with dominant energetic interactions or glue points. Yellow shaded letters mark the start and end of the NTD and blue shaded letters mark the beginning and end of the RBD across these lineages.

to WT as expected for the negation of its three key stabilizing, glue point residues. Also note that RMSF S2 domain values remain nearly the same for WT and triple mutant as expected for the more rigid and conserved S2 domain. These results show how sequence information superimposed on glue point maps followed by biophysical computations can help predict the possible outcomes of mutations to protein function.

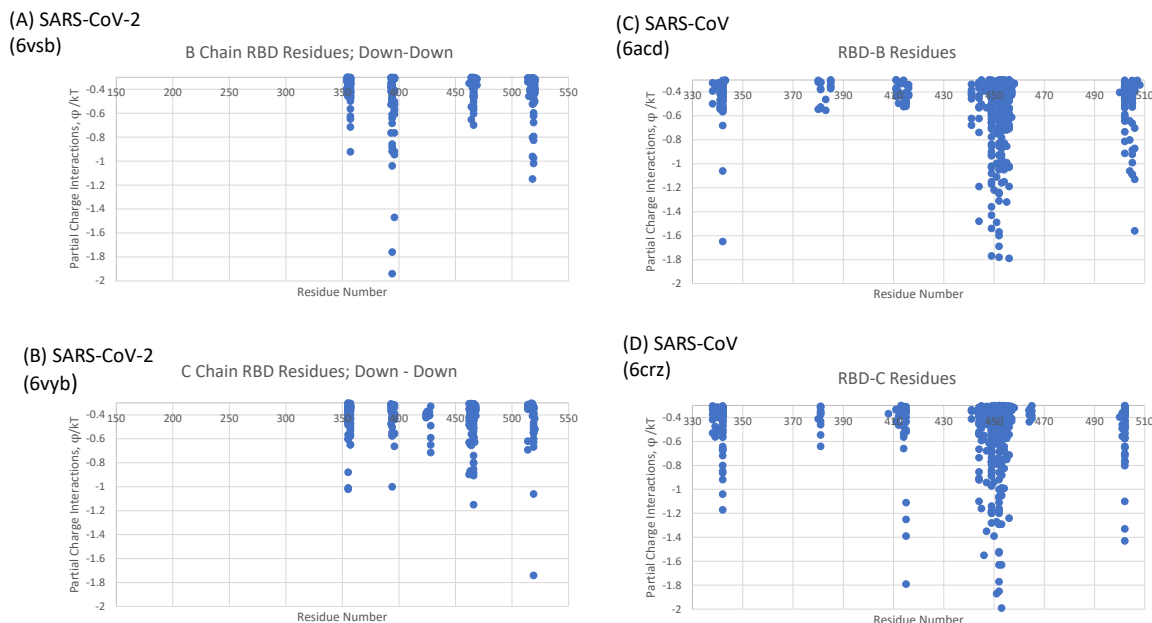

Figure 5: Comparison of SARS-CoV, (C) and (D), and SARS-CoV-2, (A) and (B), RBD-NTD neighboring chain glue points. Note that all protomers are in the Down state here. See [11] Supplementary Data for (A) and (B); Data for (C) - Table S1; Data for (D) - Table S2

### UK Variant B.1.1.7

A summary of the mutations and deletions of the UK Variant B.1.1.7 are given in Table 1. Also shown are the partner glue point residues predicted by OpenContact when the B.1.1.7 residues are in the Up state and mapped to a neighboring Down state protomer or in the Down state and mapped to a neighboring Down state protomer. As can be seen only A570D and D614G involve glue point partners within the Spike protein. None of the glue point partners are involved in the NTD-RBD sequence homologous regions presented previously. Additionally, we mapped hACE2 binding of SARS-CoV-2 RBD according to the full-length hACE2 structure file PDB ID: 6M17 [12]. We have overlaid the dominant glue point residues to hACE2 in red as shown in Fig. 6. The residue N501 is a key binding partner to hACE2 (Supplementary Table S3.) and this includes conspicuously strong interactions with Y41 of ACE2. The N501Y mutation may potentially increase binding to hACE2 significantly due to the highly favorable Y-Y hydrophobic interaction pair in the new mutant state (Table S3), however this remains to be concretely verified. Note that both D614G and N501Y are also present in the South African variant (B.1.351). Another potentially interesting feature of this variant, as seen by comparison of Figs. 7 and 8, is the flexibility associated with the dominant hACE2 binding subdomain of the RBD.

Next, we performed long time MD simulations of B.1.1.7 as described in the Methods section and shown in Fig. 8 (cf. Fig. 6). As can be seen B.1.1.7 variant maintains the highly accessible Up state due to the elimination of the D614 glue point through this structure breaking, Glycine

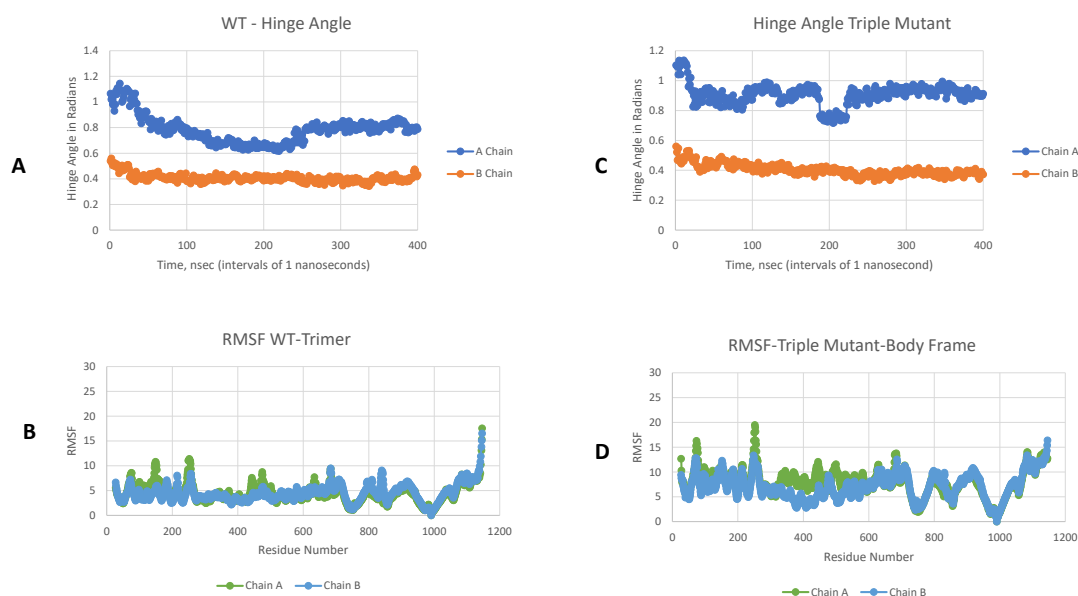

Figure 6: Hinge angle and RMSF values for Wild Type (A) and (B) frames and Triple Mutant (C) and (D) frames, respectively; Chain A is Up and Chain B is Down.

mutation in agreement with previous MD studies on this mutation [4, 5, 6]. Note that deletions associated with B.1.1.7 (Table 1.) and modeled by structure breaking Glycine mutations here, did not show any conspicuous differences in the structural state of the Spike protein and those changes do not involve any glue point residues. (Also, see Supplementary Movies: UKMutvsWT)

**Table 1. Summary of Mutations and Deletions of B.1.1.7 Variant**

| Mutation/Deletion | Up → Down   | Down → Down            | NTD-RBD Homologous | ACE2 Binding |
|-------------------|-------------|------------------------|--------------------|--------------|
| N501Y             | -           | -                      | No                 | Yes          |
| A570D             | S2: 960-967 | S2: 963-967, 875, 1000 | No                 | No           |
| D614G             | S2: 854-860 | S2: 733-735, 854-861   | No                 | No           |
| P681H             | -           | -                      | No                 | No           |
| Delete V69-S70    | -           | -                      | No                 | No           |
| Delete Y144-Y145  | -           | -                      | No                 | No           |

## Discussion

Despite its relatively low mutation rate and an inherent error correction mechanism, SARS-CoV-2 continues to display significant numbers of variants due to its high transmission and infection rates. Thus, variants represent a considerable challenge in the current COVID-19 pandemic. Here we analyzed a theoretical triple mutant based on our previous dominant energetic landscape mappings and long-time all-atom biophysical molecular computations. We demonstrated the abil-

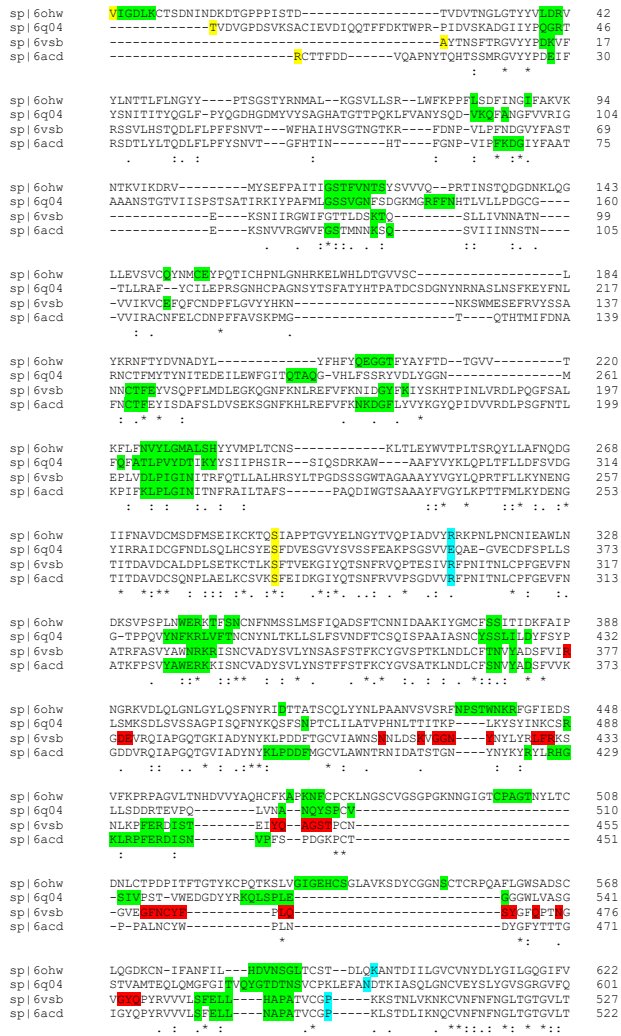

Figure 7: SARS-CoV-2 Binding residues to hACE2 (red shaded letters) shown on the combination of the Sequence Alignment Map with the Glue Point Map for the S1 Domain Across the  $\beta$  coronaviruses. See Table S3 for completer data.

ity to significantly alter protomer configurations by destabilizing these three key residues through alanine mutations or alanine screening. In a reverse sense, by the same methods, we then analyzed the emerging UK Variant B.1.1.7 in order to determine key mutations or deletions in its Spike protein that could be responsible for the more infective and transmissive state of SARS-CoV-2. Our methodology directly lead to two key mutations D614G and N501Y in agreement with other recent findings. These residues had been previously identified by us as key glue points associ-



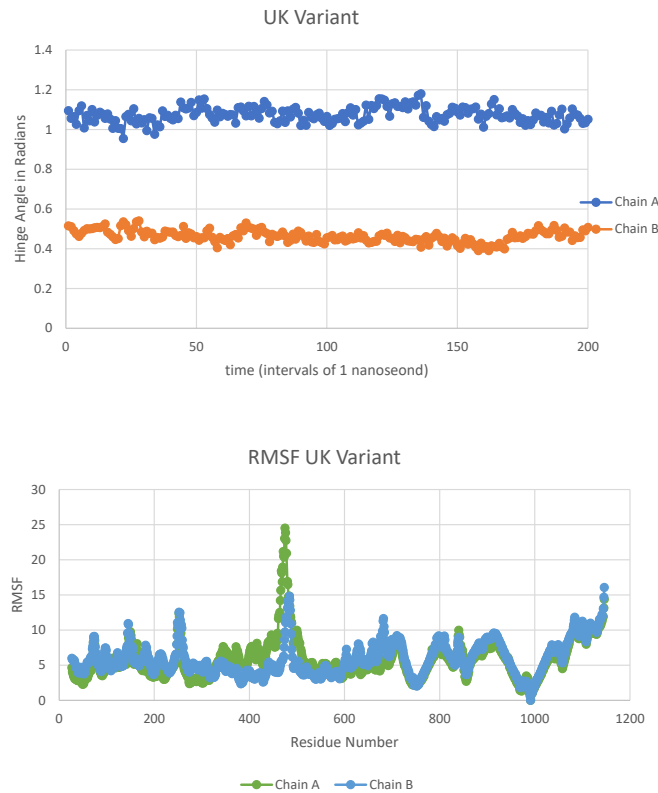

Figure 8: Hinge angle (A) and RMSF values (B) for UK Mutant B.1.1.7.

ated with dominant energetic interactions among the atoms of these residues with their partners. Biophysical computations confirm the configurational changes associated with D614G to a more ACE2 accessible state (Up state). We also show that N501Y has a potential hACE2 glue point partner 41Y, which may lead to a strong Y-Y hydrophobic residue pair interaction; this may be partially responsible for the higher infection rate of the UK (B.1.1.7) and SA (B.1.351) variants, although more studies are needed to verify this. Thus, the two key mutations may increase transmission and infection rates by two distinctly different mechanisms. We also noted more flexibility in the subdomain of the RBD for B.1.1.7 variant that forms dominant interactions with hACE2, as compared to WT, although more studies are needed to quantify this potential feature and its consequences. Additionally, by overlaying dominant energetic mappings to sequence alignment maps across lineages of  $\beta$  coronaviruses we identified "homologous sequence glue points" that could be important in ascertaining the impact of future variants through sequence information. It is clear that tools are needed to quickly translate genome sequence information to potential virion function in order to help direct mitigation strategies and resources in an optimized way. Here we demonstrate that a combination of protein residue sequence alignment superimposed on glue point and binding point residue identification can flag potential Spike protein function changes and associated viral behavior. These flagged residues can be further analyzed through long-time biophysical computations to more precisely probe functional changes.

## References

- [1] Muhammad Adnan Shereen, Suliman Khan, Abeer Kazmi, Nadia Bashir, and Rabeea Siddique. COVID-19 infection: Origin, transmission, and characteristics of human coronaviruses. *Journal of Advanced Research*, 24:91–98, July 2020.
- [2] Michael Letko, Andrea Marzi, and Vincent Munster. Functional assessment of cell entry and receptor usage for SARS-CoV-2 and other lineage B betacoronaviruses. *Nature Microbiology*, 5(4):562–569, April 2020.
- [3] Lucy van Dorp, Damien Richard, Cedric C. S. Tan, Liam P. Shaw, Mislav Acman, and François Balloux. No evidence for increased transmissibility from recurrent mutations in SARS-CoV-2. *Nature Communications*, 11(1):5986, December 2020.
- [4] Bette Korber, Will M. Fischer, Sandrasegaram Gnanakaran, Hyejin Yoon, James Theiler, Werner Abfalterer, Nick Hengartner, Elena E. Giorgi, Tanmoy Bhattacharya, Brian Foley, Kathryn M. Hastie, Matthew D. Parker, David G. Partridge, Cariad M. Evans, Timothy M. Freeman, Thushan I. de Silva, Charlene McDanal, Lautaro G. Perez, Haili Tang, Alex Moon-Walker, Sean P. Whelan, Celia C. LaBranche, Erica O. Saphire, David C. Montefiori, Adrienne Angyal, Rebecca L. Brown, Laura Carrilero, Luke R. Green, Danielle C. Groves, Katie J. Johnson, Alexander J. Keeley, Benjamin B. Lindsey, Paul J. Parsons, Mohammad Raza, Sarah Rowland-Jones, Nikki Smith, Rachel M. Tucker, Dennis Wang, and Matthew D. Wyles. Tracking Changes in SARS-CoV-2 Spike: Evidence that D614G Increases Infectivity of the COVID-19 Virus. *Cell*, 182(4):812–827.e19, August 2020.
- [5] Leonid Yurkovetskiy, Xue Wang, Kristen E. Pascal, Christopher Tomkins-Tinch, Thomas P. Nyalile, Yetao Wang, Alina Baum, William E. Diehl, Ann Dauphin, Claudia Carbone, Kristen Veinotte, Shawn B. Egri, Stephen F. Schaffner, Jacob E. Lemieux, James B. Munro, Ashique Rafique, Abhi Barve, Pardis C. Sabeti, Christos A. Kyratsous, Natalya V. Dudkina, Kuang Shen, and Jeremy Luban. Structural and Functional Analysis of the D614G SARS-CoV-2 Spike Protein Variant. *Cell*, 183(3):739–751.e8, October 2020.
- [6] Mohammad Mahmoudi Gomari, Neda Rostami, Hossein Omid-Ardali, and Seyed Shahriar Arab. Insight into molecular characteristics of SARS-CoV-2 spike protein following D614G point mutation, a molecular dynamics study. *Journal of Biomolecular Structure and Dynamics*, pages 1–9, January 2021.
- [7] Andrew Rambaut, Edward C. Holmes, Áine O’Toole, Verity Hill, John T. McCrone, Christopher Ruis, Louis du Plessis, and Oliver G. Pybus. A dynamic nomenclature proposal for SARS-CoV-2 lineages to assist genomic epidemiology. *Nature Microbiology*, 5(11):1403–1407, November 2020.
- [8] Tingting Li, Qingbing Zheng, Hai Yu, Dinghui Wu, Wenhui Xue, Yuyun Zhang, Xiaofen Huang, Lizhi Zhou, Zhigang Zhang, Zhenghui Zha, Tingting Chen, Zhiping Wang, Jie Chen, Hui Sun, Tingting Deng, Yingbin Wang, Yixin Chen, Qinjian Zhao, Jun Zhang, Ying Gu, Shaowei Li, and Ningshao Xia. Characterization of the SARS-CoV-2 Spike in an Early Prefusion Conformation. preprint, *Molecular Biology*, March 2020.

- [9] Daniel Wrapp, Nianshuang Wang, Kizzmekia S. Corbett, Jory A. Goldsmith, Ching-Lin Hsieh, Olubukola Abiona, Barney S. Graham, and Jason S. McLellan. Cryo-EM structure of the 2019-nCoV spike in the prefusion conformation. *Science*, 367(6483):1260–1263, March 2020.
- [10] Alexandra C. Walls, Young-Jun Park, M. Alexandra Tortorici, Abigail Wall, Andrew T. McGuire, and David Veesler. Structure, function and antigenicity of the SARS-CoV-2 spike glycoprotein. preprint, *Biochemistry*, February 2020.
- [11] Michael H. Peters, Oscar Bastidas, Daniel S. Kokron, and Christopher E. Henze. Static all-atom energetic mappings of the SARS-Cov-2 spike protein and dynamic stability analysis of “Up” versus “Down” protomer states. *PLOS ONE*, 15(11):e0241168, November 2020.
- [12] Renhong Yan, Yuanyuan Zhang, Yanning Li, Lu Xia, Yingying Guo, and Qiang Zhou. Structural basis for the recognition of SARS-CoV-2 by full-length human ACE2. *Science*, 367(6485):1444, March 2020.
- [13] Rory Henderson, Robert J. Edwards, Katayoun Mansouri, Katarzyna Janowska, Victoria Stalls, Sophie M. C. Gobeil, Megan Kopp, Dapeng Li, Rob Parks, Allen L. Hsu, Mario J. Borgnia, Barton F. Haynes, and Priyamvada Acharya. Controlling the SARS-CoV-2 spike glycoprotein conformation. *Nature Structural & Molecular Biology*, July 2020.
- [14] Wenfei Song, Miao Gui, Xinquan Wang, and Ye Xiang. Cryo-EM structure of the SARS coronavirus spike glycoprotein in complex with its host cell receptor ACE2. *PLOS Pathogens*, 14(8):e1007236, August 2018.
- [15] Michael H. Peters, Oscar Bastidas, Daniel S. Kokron, and Christopher Henze. Static All-Atom Energetic Mappings of the SARS-Cov-2 Spike Protein with Potential Latch Identification of the Down State Protomer. preprint, *Biophysics*, May 2020.
- [16] James C. Phillips, Rosemary Braun, Wei Wang, James Gumbart, Emad Tajkhorshid, Elizabeth Villa, Christophe Chipot, Robert D. Skeel, Laxmikant Kalé, and Klaus Schulten. Scalable molecular dynamics with NAMD. *Journal of Computational Chemistry*, 26(16):1781–1802, December 2005.
- [17] Sunhwan Jo, Taehoon Kim, Vidyashankara G. Iyer, and Wonpil Im. CHARMM-GUI: a web-based graphical user interface for CHARMM. *Journal of Computational Chemistry*, 29(11):1859–1865, August 2008.
- [18] Andrew Waterhouse, Martino Bertoni, Stefan Bienert, Gabriel Studer, Gerardo Tauriello, Rafal Gumienny, Florian T Heer, Tjaart A P de Beer, Christine Rempfer, Lorenza Bordoli, Rosalba Lepore, and Torsten Schwede. SWISS-MODEL: homology modelling of protein structures and complexes. *Nucleic Acids Research*, 46(W1):W296–W303, July 2018.
- [19] Fabian Sievers, Andreas Wilm, David Dineen, Toby J Gibson, Kevin Karplus, Weizhong Li, Rodrigo Lopez, Hamish McWilliam, Michael Remmert, Johannes Söding, Julie D Thompson, and Desmond G Higgins. Fast, scalable generation of high-quality protein multiple sequence alignments using Clustal Omega. *Molecular Systems Biology*, 7(1):539, January 2011.

- [20] Young-Jun Park, Alexandra C. Walls, Zhaoqian Wang, Maximillian M. Sauer, Wentao Li, M. Alejandra Tortorici, Berend-Jan Bosch, Frank DiMaio, and David Veeler. Structures of MERS-CoV spike glycoprotein in complex with sialoside attachment receptors. *Nature Structural & Molecular Biology*, 26(12):1151–1157, December 2019.
- [21] M. Alejandra Tortorici, Alexandra C. Walls, Yifei Lang, Chunyan Wang, Zeshi Li, Danielle Koerhuis, Geert-Jan Boons, Berend-Jan Bosch, Félix A. Rey, Raoul J. de Groot, and David Veeler. Structural basis for human coronavirus attachment to sialic acid receptors. *Nature Structural & Molecular Biology*, 26(6):481–489, June 2019.
- [22] Alex Krall, Jonathan Brunn, Spandana Kankanala, and Michael H. Peters. A simple contact mapping algorithm for identifying potential peptide mimetics in protein-protein interaction partners: Contact Mapping for Potential Peptide Mimetics. *Proteins: Structure, Function, and Bioinformatics*, 82(9):2253–2262, September 2014.
- [23] Cheng Peng, Zhengdan Zhu, Yulong Shi, Xiaoyu Wang, Kaijie Mu, Yanqing Yang, Xinben Zhang, Zhijian Xu, and Weiliang Zhu. Computational Insights into the Conformational Accessibility and Binding Strength of SARS-CoV-2 Spike Protein to Human Angiotensin-Converting Enzyme 2. *The Journal of Physical Chemistry Letters*, 11(24):10482–10488, December 2020.
- [24] Robert N. Kirchdoerfer, Nianshuang Wang, Jesper Pallesen, Daniel Wrapp, Hannah L. Turner, Christopher A. Cottrell, Kizzmekia S. Corbett, Barney S. Graham, Jason S. McLellan, and Andrew B. Ward. Stabilized coronavirus spikes are resistant to conformational changes induced by receptor recognition or proteolysis. *Scientific Reports*, 8(1):15701, December 2018.

**5. Acknowledgments** M.H.P. would like to thank the VCU Office of the Vice President for Research, the VCU Department of Chemical and Life Science Engineering, the VCU Center for High Performance Computing, the COVID-19 HPC Consortium (<https://covid19-hpc-consortium.org/>), and Hoth Therapeutics, Inc. for their continued support of our overall COVID-19 research efforts. O.B. was supported by the National Institutes of Health Institutional and Academic Career Development Award K12GM119955.

**Open Source Software.** OpenContact is freely available under the Third-Party Software Tools listings of the Protein Data Bank <https://www.rcsb.org> or visit <http://people.vcu.edu/~mpeters>

**Competing Interests** V.C.U (M.H.P.) entered an exclusive licensing agreement for "ACE2 Decoy Peptides in the Treatment of COVID-19" with Hoth Therapeutics, NY.

**Supplementary Information:**

**ClustalMView.ppt**

**Table-Headings.txt**



**Table S1** 6ACD-B-RBDtoA-NTD-finedata.txt

**Table S2** 6CRZ-C-RBDtoA-NTD-finedata.txt

**Table S3** 6M17BchaintoEchain-finedata.txt

**Supplementary Movie: UKMutvsWTUpChain.mp4**

**Supplementary Movie: UKMutvsWTDownChain.mp4**
